# Supplementary material for: H2S-Synthesizing Enzymes Are Putative Determinants in Lung Cancer Management toward Personalized Medicine
Source: MDPI journal article supplement (doi:10.3390/antiox13010051), 2023-12-28
Supplement: s1 [file s1]

## Supplementary Figures

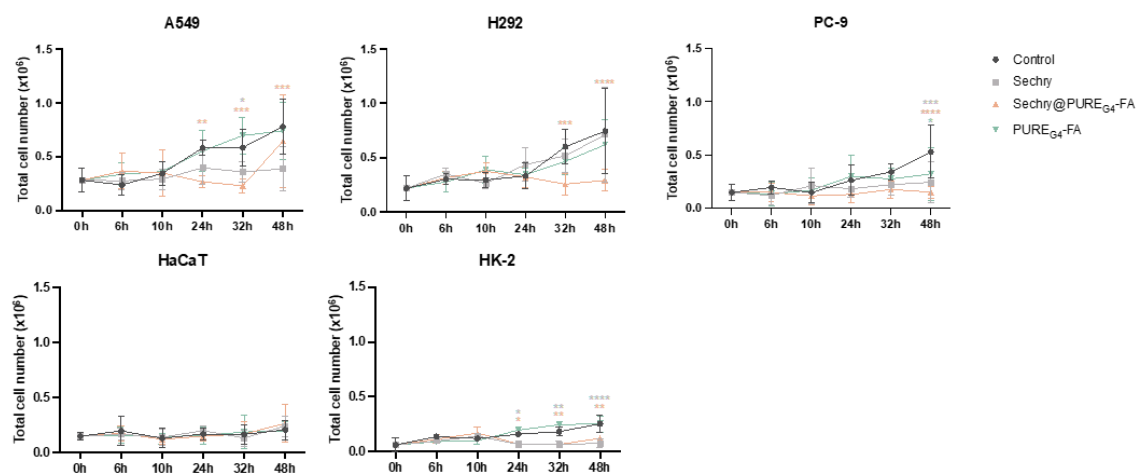

**Suppl Figure 1.** SeChry and SeChry@PURE<sub>G4</sub>-FA induced significant decrease in cell proliferation across the NSCLC panel used. All data are normalized to the control condition and represented as mean  $\pm$  SD. \* $p < 0.05$ , \*\* $p < 0.01$ , \*\*\* $p < 0.001$ , \*\*\*\* $p < 0.0001$ .

A

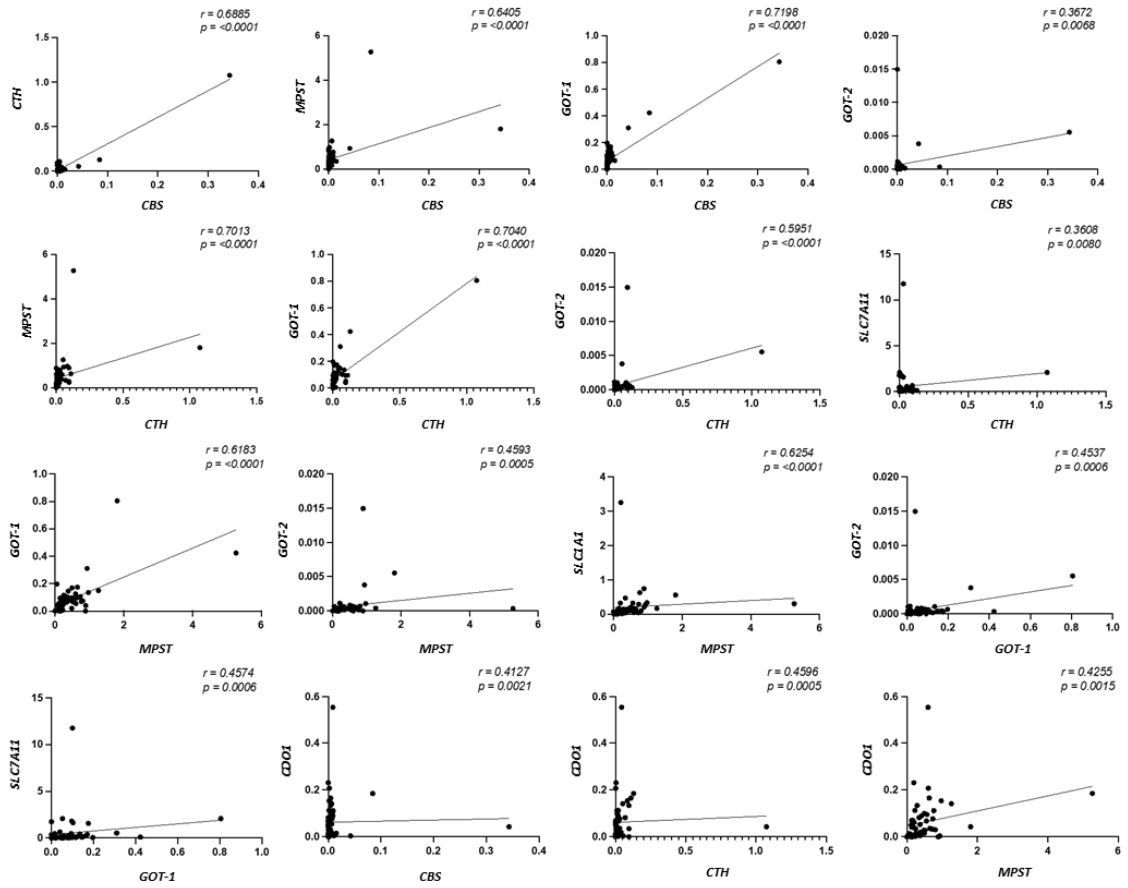

B

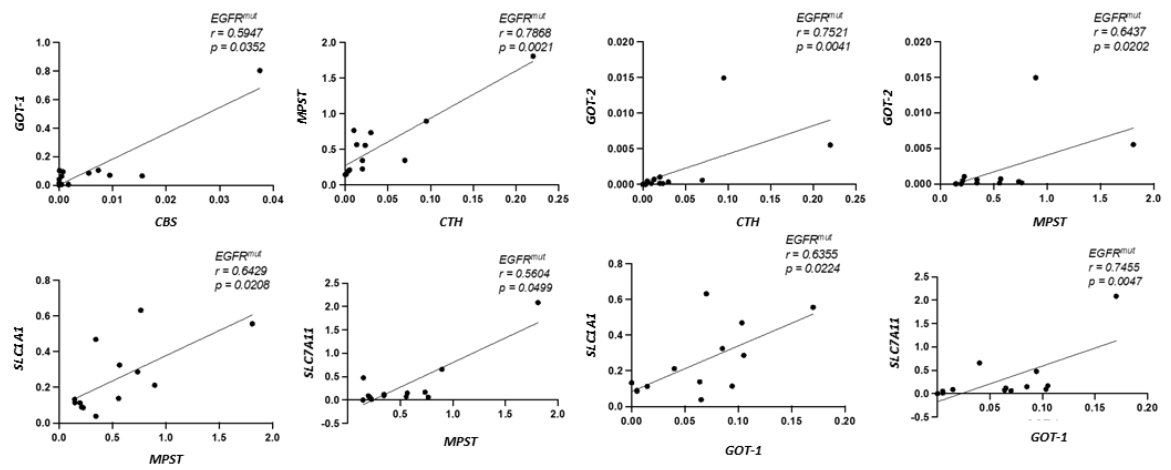

C

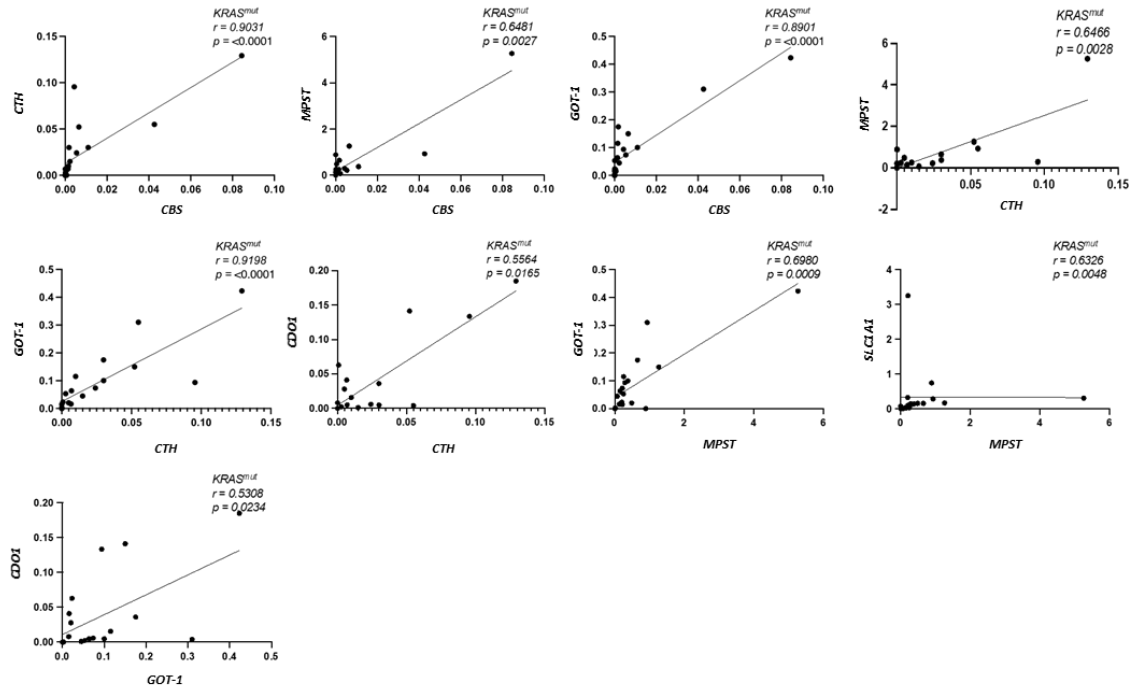

**Suppl Figure 2.** (A) Spearman correlation was significantly found between the expression of several analyzed genes: *CBS* with *CTH*, *MPST*, *GOT1*, *GOT2* and *CDO1*; *CTH* with *CBS*, *MPST*, *GOT1*, *GOT2*, *CDO1* and *SLC7A11*; *MPST* with *CBS*, *CTH*, *GOT1*, *GOT2*, *CDO1* and *SLC1A1*, and *GOT1* with *GOT2* and *SLC7A11*. (B) Correlations between cysteine-related genes in cases presenting  $EGFR^{Mut}$  indicate a significant Spearman correlation between the expression of *CBS* with *GOT1*; *CTH* with *MPST* and *GOT2*; *MPST* with *GOT2*, *SLC1A1* and *SLC7A11*, and *GOT1* with *SLC1A1* and *SLC7A11*. (C) Correlations between cysteine-related genes in cases presenting  $KRAS^{Mut}$  indicate a significant Spearman correlation between the expression *CBS* with *CTH*, *MPST* and *GOT1*; *CTH* with *CBS*, *MPST*, *GOT1* and *CDO1*; *MPST* with *CBS*, *CTH*, *GOT1* and *SLC1A1*, and *GOT1* with *CDO1*.
